# Supplementary material for: Informativeness across Interpreting Types: Implications for Language Shifts under Cognitive Load
Source: MDPI journal article supplement (doi:10.3390/e25020243), 2023-01-28
Supplement: s1 [file s1]

## Supplementary Materials

**Table S1.** Word entropy and POS entropy of CI and SI texts.

| Text<br>Number | Word entropy |        |       |       | POS entropy |        |       |       |
|----------------|--------------|--------|-------|-------|-------------|--------|-------|-------|
|                | CI           | SI     | CI    | SI    | CI          | SI     | CI    | SI    |
|                | output       | output | input | input | output      | output | input | input |
| 1              | 8.292        | 8.475  | 8.638 | 9.062 | 3.384       | 3.246  | 3.545 | 3.025 |
| 2              | 8.293        | 8.261  | 8.629 | 8.618 | 3.459       | 3.218  | 3.673 | 3.162 |
| 3              | 8.116        | 8.376  | 8.63  | 8.935 | 3.415       | 3.283  | 3.626 | 3.14  |
| 4              | 8.06         | 8.489  | 8.604 | 9.156 | 3.434       | 3.268  | 3.569 | 3.097 |
| 5              | 8.419        | 8.532  | 8.827 | 9.14  | 3.416       | 3.276  | 3.58  | 3.128 |
| 6              | 8.289        | 8.472  | 8.581 | 9.366 | 3.415       | 3.249  | 3.601 | 2.921 |
| 7              | 8.263        | 8.526  | 8.739 | 9.049 | 3.407       | 3.231  | 3.552 | 3.097 |
| 8              | 8.395        | 8.306  | 8.836 | 8.799 | 3.428       | 3.176  | 3.61  | 3.057 |
| 9              | 8.292        | 8.608  | 8.841 | 9.134 | 3.35        | 3.212  | 3.553 | 3.108 |
| 10             | 8.423        | 8.481  | 8.87  | 9.117 | 3.39        | 3.212  | 3.494 | 3.177 |
| 11             | 8.598        | 8.519  | 9.037 | 9.097 | 3.353       | 3.248  | 3.49  | 3.304 |
| 12             | 8.592        | 8.642  | 8.863 | 9.122 | 3.358       | 3.217  | 3.458 | 3.176 |
| 13             | 8.391        | 8.35   | 8.821 | 8.933 | 3.383       | 3.2    | 3.525 | 3.074 |
| 14             | 8.459        | 8.409  | 8.869 | 9.087 | 3.37        | 3.284  | 3.545 | 3.072 |
| 15             | 8.623        | 8.404  | 8.957 | 9.035 | 3.377       | 3.27   | 3.54  | 3.087 |
| 16             | 8.647        | 8.263  | 9.048 | 8.932 | 3.315       | 3.28   | 3.43  | 3.382 |
| 17             | 8.692        | 8.474  | 9.027 | 9.104 | 3.345       | 3.253  | 3.496 | 3.071 |

**Table S2.** Word RR and POS RR of CI and SI texts.

| Text<br>Number | Word RR      |              |             |             | POS RR       |              |             |             |
|----------------|--------------|--------------|-------------|-------------|--------------|--------------|-------------|-------------|
|                | CI<br>output | SI<br>output | CI<br>input | SI<br>input | CI<br>output | SI<br>output | CI<br>input | SI<br>input |
| 1              | 1.22%        | 1.34%        | 1.03%       | 0.59%       | 11.51%       | 13.75%       | 14.27%      | 23.16%      |
| 2              | 1.21%        | 1.40%        | 1.03%       | 0.88%       | 10.63%       | 13.70%       | 12.45%      | 19.41%      |
| 3              | 1.45%        | 1.26%        | 0.97%       | 0.69%       | 11.09%       | 12.91%       | 13.36%      | 20.33%      |
| 4              | 1.43%        | 1.27%        | 1.00%       | 0.56%       | 11.06%       | 13.20%       | 14.00%      | 21.03%      |
| 5              | 1.23%        | 1.23%        | 0.94%       | 0.58%       | 11.17%       | 13.21%       | 13.43%      | 20.59%      |
| 6              | 1.15%        | 1.28%        | 1.15%       | 0.35%       | 11.19%       | 13.40%       | 13.36%      | 23.69%      |
| 7              | 1.29%        | 1.31%        | 0.89%       | 0.59%       | 11.58%       | 13.95%       | 14.22%      | 21.40%      |
| 8              | 1.19%        | 1.40%        | 0.89%       | 0.71%       | 11.29%       | 14.45%       | 13.45%      | 22.20%      |
| 9              | 1.43%        | 1.29%        | 0.96%       | 0.59%       | 12.25%       | 14.12%       | 13.54%      | 21.47%      |
| 10             | 1.13%        | 1.33%        | 0.90%       | 0.61%       | 11.51%       | 13.77%       | 14.57%      | 20.13%      |
| 11             | 1.00%        | 1.19%        | 0.78%       | 0.67%       | 12.29%       | 13.62%       | 14.86%      | 18.26%      |
| 12             | 0.92%        | 1.10%        | 0.85%       | 0.59%       | 12.09%       | 14.01%       | 15.40%      | 19.99%      |
| 13             | 1.12%        | 1.38%        | 0.90%       | 0.59%       | 11.59%       | 13.73%       | 14.35%      | 21.12%      |
| 14             | 1.02%        | 1.25%        | 0.82%       | 0.58%       | 11.87%       | 13.06%       | 13.85%      | 20.70%      |
| 15             | 1.00%        | 1.28%        | 0.79%       | 0.60%       | 11.95%       | 13.33%       | 13.93%      | 21.67%      |
| 16             | 1.00%        | 1.39%        | 0.69%       | 0.65%       | 12.52%       | 12.81%       | 15.79%      | 16.53%      |
| 17             | 0.92%        | 1.31%        | 0.65%       | 0.55%       | 12.25%       | 13.36%       | 14.67%      | 21.50%      |
